# Supplementary material
Source: PubMed Central journal article supplement (PMC3779434)
Supplement: NIHMS496213-supplement-Table_1.pdf [file NIHMS496213-supplement-Table_1.pdf]

Supplemental Table 1: %CD63hi

|                        | Placebo      |                      |                        |         | Peanut        |                       |                        |                        |         | Interaction P between groups |
|------------------------|--------------|----------------------|------------------------|---------|---------------|-----------------------|------------------------|------------------------|---------|------------------------------|
|                        | Day 0<br>n=8 | Day 21 to 156<br>n=7 | Day 157 to 423<br>n=11 | Trend P | Day 0<br>n=15 | Day 21 to 156<br>n=20 | Day 157 to 423<br>n=18 | Day 424 to 827<br>n=10 | Trend P |                              |
| <b>Peanut</b>          |              |                      |                        |         |               |                       |                        |                        |         |                              |
| 10 <sup>1</sup> µg/mL  | 35.9 (22.4)  | 19.5 (14.7)          | 28.2 (20.5)            | 0.37    | 36.5 (22.1)   | 23.1 (25.9)           | 14.8 (15.4)            | 5.63 (5.44)            | <0.001  | 0.11                         |
| 10 <sup>0</sup> µg/mL  | 34.6 (25.2)  | 20.3 (16.2)          | 28.8 (21.5)            | 0.41    | 38.4 (23.4)   | 21.1 (22.8)           | 11.8 (13.7)            | 3.09 (3.38)            | <0.001  | <0.05                        |
| 10 <sup>-1</sup> µg/mL | 42.7 (27.9)  | 24.5 (22.6)          | 32.5 (25.0)            | 0.10    | 40.5 (21.7)   | 17.3 (19.0)           | 10.2 (10.0)            | 2.09 (1.94)            | <0.001  | 0.10                         |
| 10 <sup>-2</sup> µg/mL | 32.6 (24.6)  | 15.1 (16.7)          | 24.5 (20.5)            | 0.22    | 28.3 (19.5)   | 7.63 (10.0)           | 4.87 (6.25)            | 1.01 (1.06)            | <0.001  | 0.16                         |
| 10 <sup>-3</sup> µg/mL | 6.20 (4.86)  | 4.43 (6.08)          | 10.4 (10.4)            | 0.42    | 14.0 (19.0)   | 2.17 (3.28)           | 2.03 (4.52)            | 0.44 (0.86)            | <0.001  | <0.05                        |
| 10 <sup>-4</sup> µg/mL | 3.42 (4.58)  | 1.35 (0.92)          | 3.86 (7.30)            | 0.87    | 10.2 (21.5)   | 1.66 (4.36)           | 0.71 (0.87)            | 0.88 (1.46)            | <0.01   | 0.10                         |
|                        |              |                      |                        |         |               |                       |                        |                        |         |                              |
| anti-IgE w/ IL-3       | 31.5 (23.3)  | 14.9 (13.2)          | 23.6 (22.2)            | 0.14    | 29.2 (22.4)   | 15.8 (18.2)           | 11.2 (14.1)            | 3.74 (6.61)            | <0.001  | 0.08                         |
| fMPLP w/ IL-3          | 56.0 (20.3)  | 34.2 (20.0)          | 49.9 (24.0)            | 0.87    | 35.5 (28.3)   | 35.5 (25.9)           | 24.4 (20.3)            | 18.1 (15.6)            | 0.19    | 0.57                         |
| IL-3 alone             | 1.32 (0.91)  | 0.69 (0.51)          | 3.37 (7.07)            | 0.89    | 1.34 (1.88)   | 1.79 (5.78)           | 0.64 (0.67)            | 0.67 (1.39)            | 0.42    | 0.47                         |
| Medium alone           | 0.41 (0.46)  | 0.38 (0.31)          | 1.06 (1.51)            | 0.47    | 0.39 (0.43)   | 0.44 (0.43)           | 0.47 (0.55)            | 0.65 (1.08)            | 0.36    | 0.53                         |
|                        |              |                      |                        |         |               |                       |                        |                        |         |                              |
| <b>Egg†</b>            |              |                      |                        |         |               |                       |                        |                        |         |                              |
| 10 <sup>0</sup> µg/mL  |              |                      |                        |         | 18.3 (24.1)   | 3.98 (6.19)           | 7.09 (9.14)            | 5.58 (8.69)            | <0.05   |                              |
| 10 <sup>-1</sup> µg/mL |              |                      |                        |         | 18.5 (26.0)   | 2.88 (4.28)           | 7.94 (11.5)            | 4.75 (6.00)            | <0.05   |                              |
| 10 <sup>-2</sup> µg/mL |              |                      |                        |         | 12.0 (21.9)   | 1.61 (3.85)           | 7.14 (11.2)            | 3.12 (4.85)            | 0.17    |                              |
| 10 <sup>-3</sup> µg/mL |              |                      |                        |         | 5.77 (14.7)   | 1.52 (4.13)           | 2.64 (6.29)            | 2.77 (7.82)            | 0.91    |                              |

Descriptive statistics are means (standard deviations). The p-value for trend is computed from a linear mixed model with group, time and group by time as fixed effects and a random intercept to account for the within-subject correlation over time. † Only egg allergic individuals.
