# Supplementary material
Source: PubMed Central journal article supplement (PMC3779434)

**A**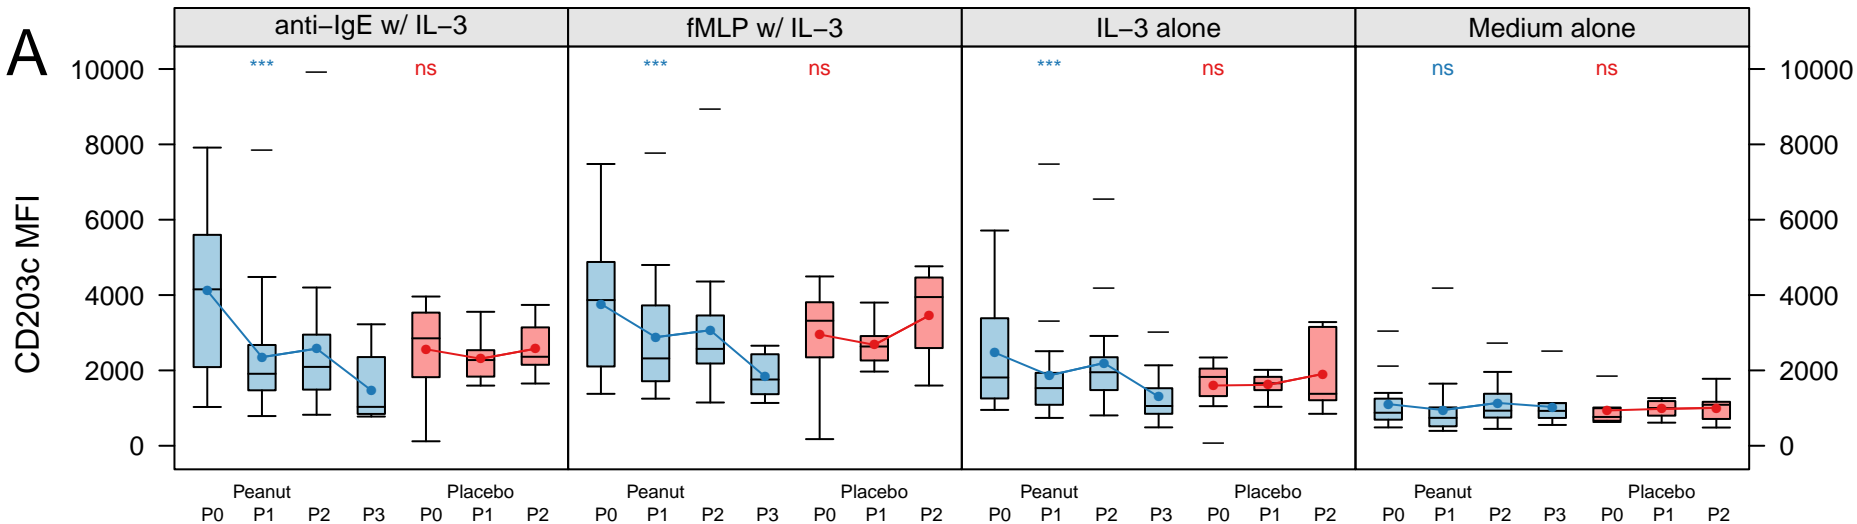**B**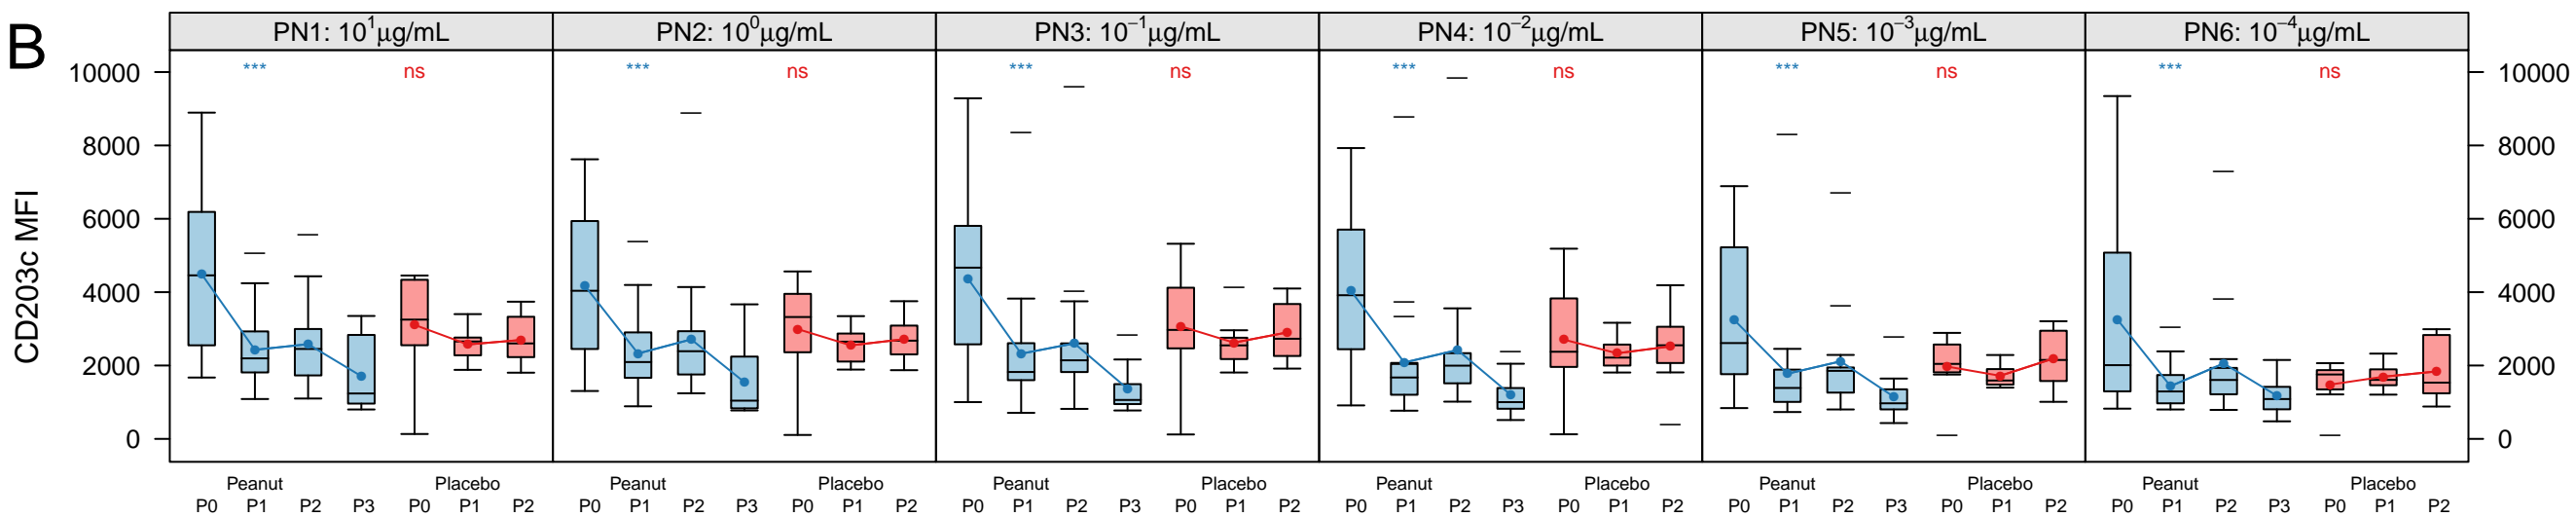

Supplement: NIHMS496213-supplement-Supplemental_Figure_1.pdf [file NIHMS496213-supplement-Supplemental_Figure_1.pdf]

**A**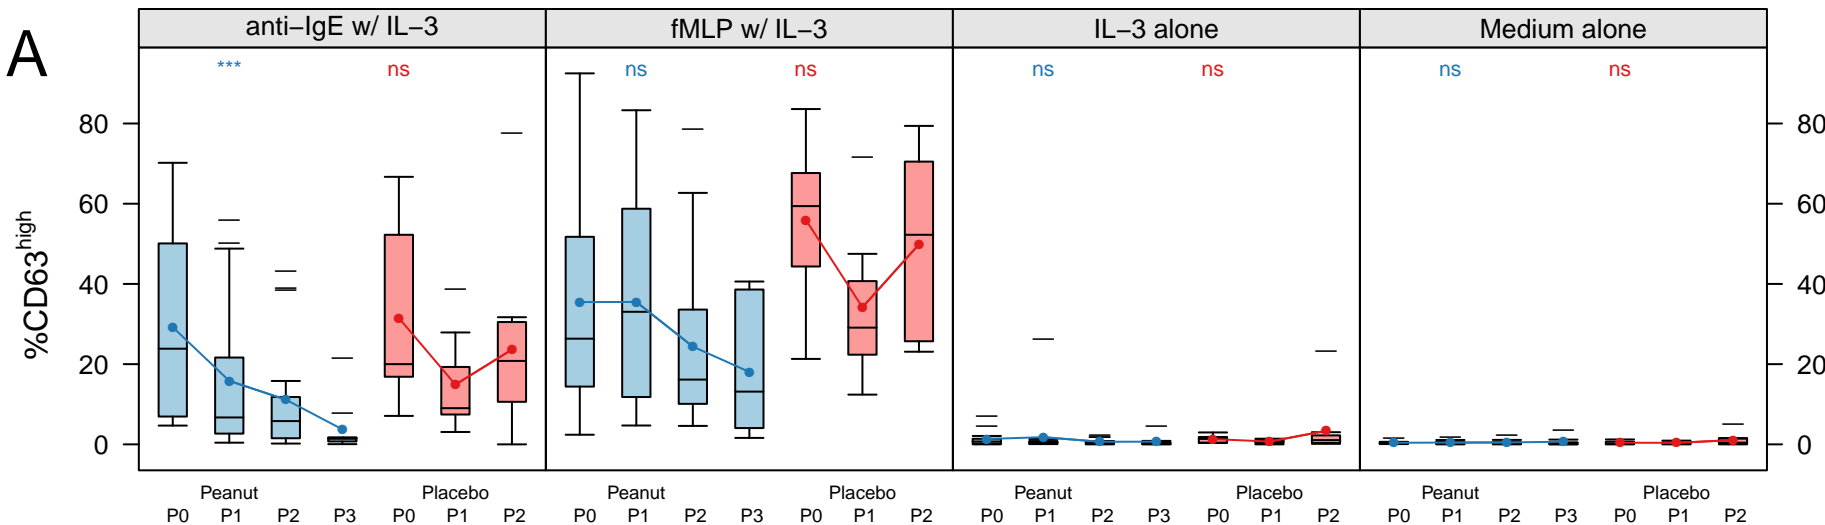**B**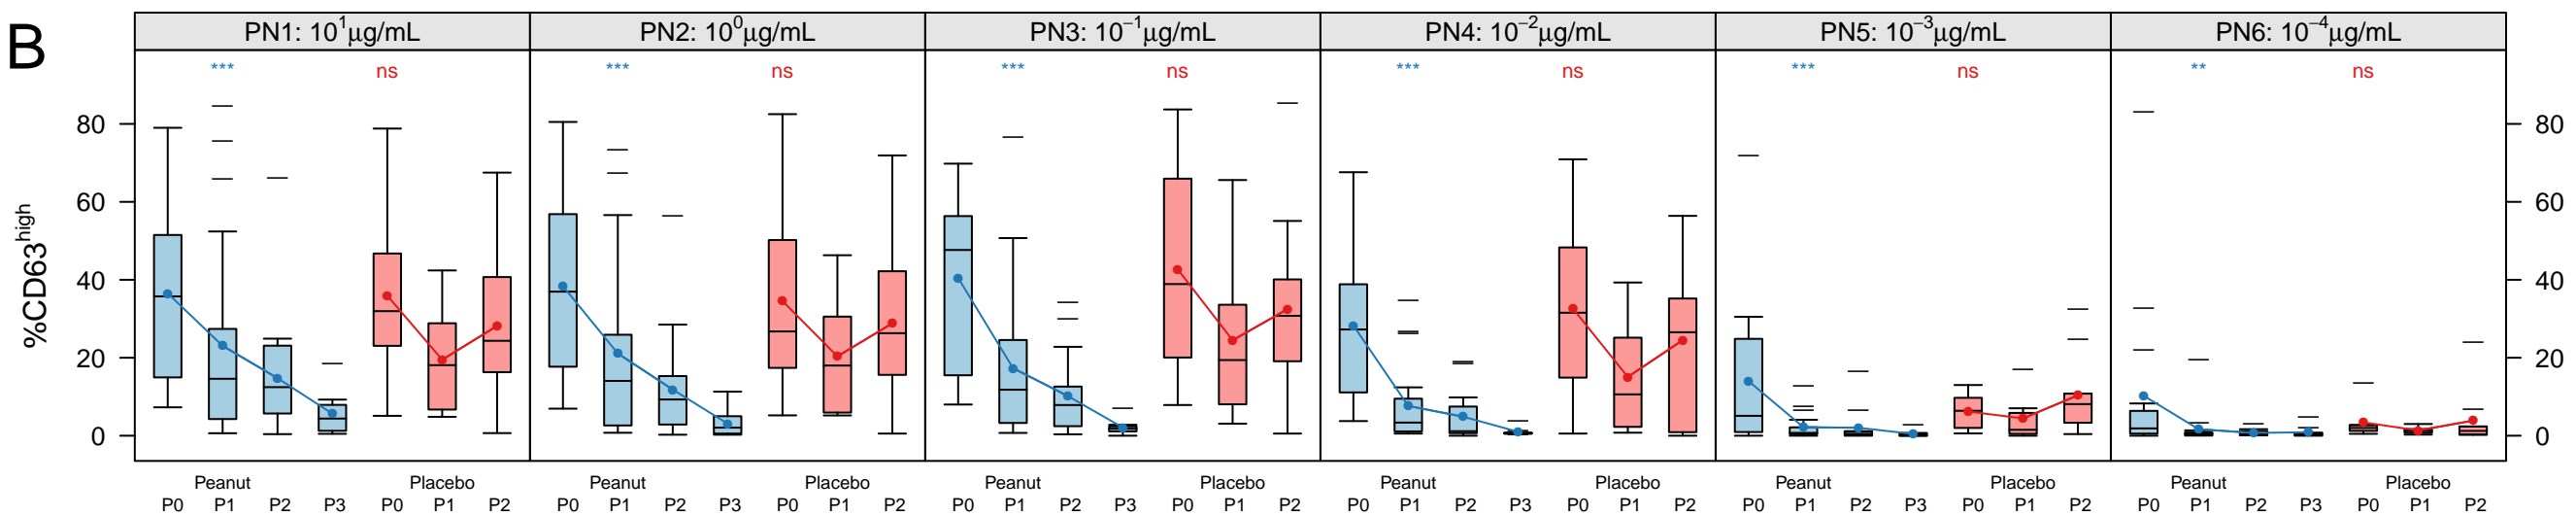

Supplement: NIHMS496213-supplement-Supplemental_Figure_2.pdf [file NIHMS496213-supplement-Supplemental_Figure_2.pdf]
